# Supplementary material for: Genome assembly of six polyploid potato genomes
Source: PubMed Central journal article supplement (PMC7066127; doi:10.1038/s41597-020-0428-4), 2020-03-11
Supplement: 41597_2020_428_MOESM1_ESM.pdf [file 41597_2020_428_MOESM1_ESM.pdf]

**K-mer frequency of the CHA genome**

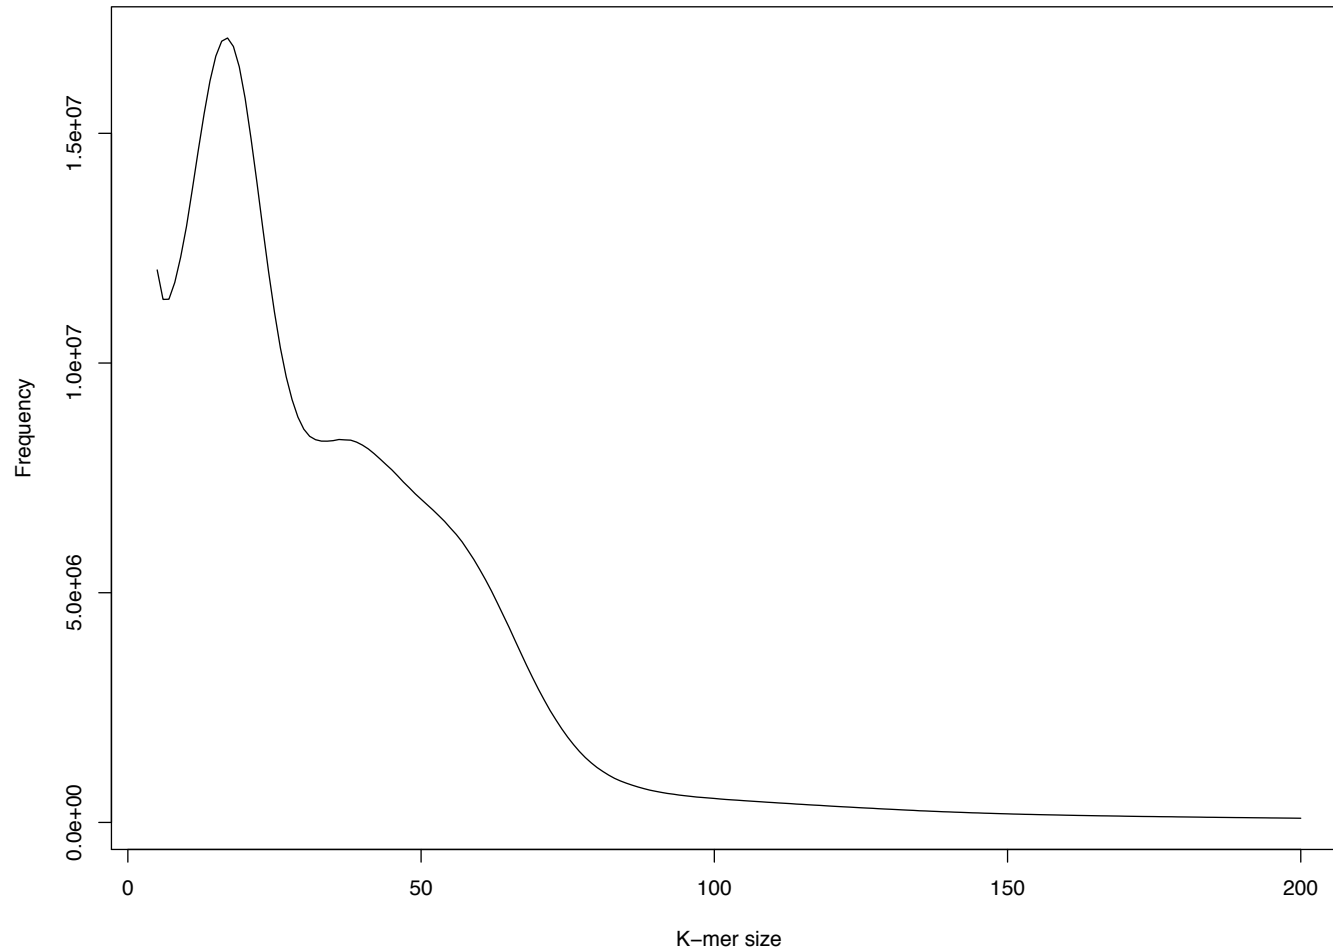

Supplementary Figure 1: The k-mer frequency of the CHA genome. The increased heterozygosity of the genome is validated by the tendency towards bimodal distribution of the k-mer frequency.

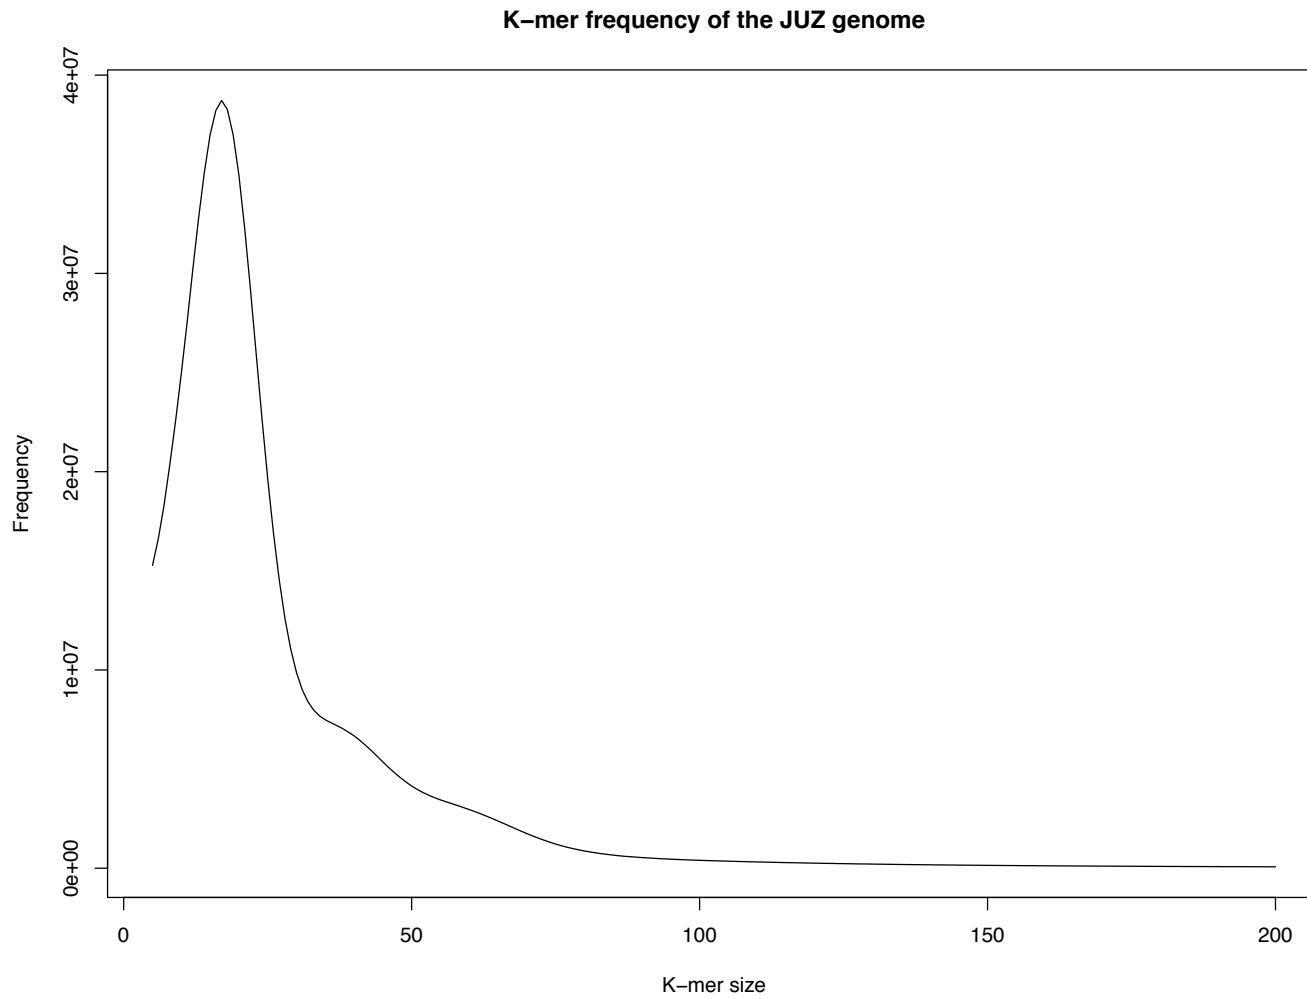

Supplementary Figure 2: The k-mer frequency of the JUZ genome. The increased heterozygosity of the genome is validated by the tendency towards bimodal distribution of the k-mer frequency.

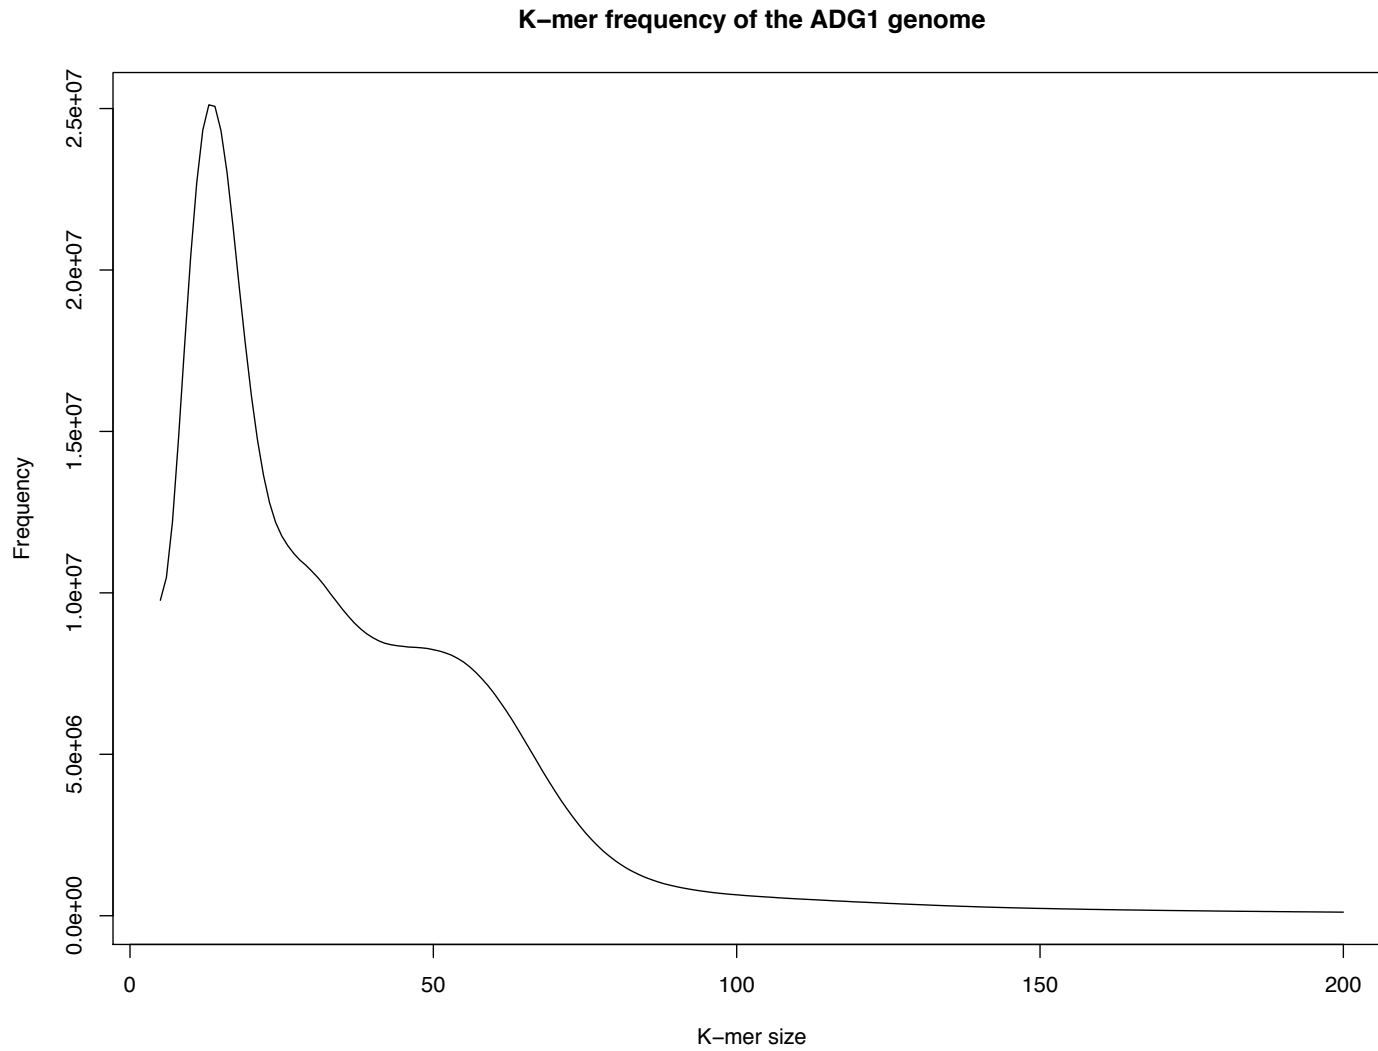

Supplementary Figure 3: The k-mer frequency of the ADG1 genome. The increased heterozygosity of the genome is validated by the tendency towards bimodal distribution of the k-mer frequency.

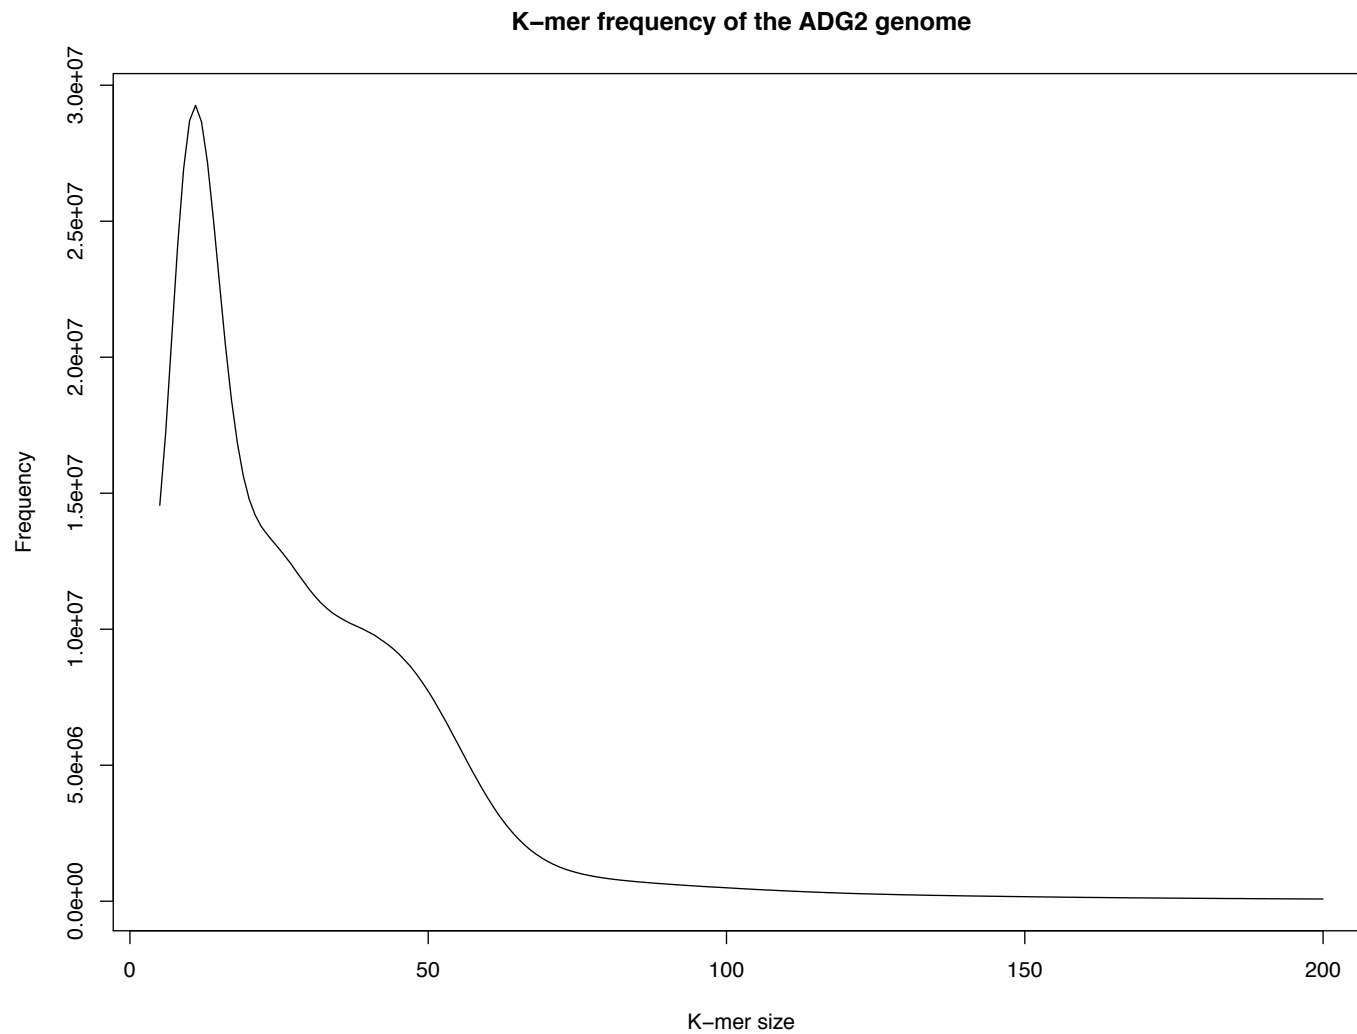

Supplementary Figure 4: The k-mer frequency of the ADG2 genome. The increased heterozygosity of the genome is validated by the tendency towards bimodal distribution of the k-mer frequency.

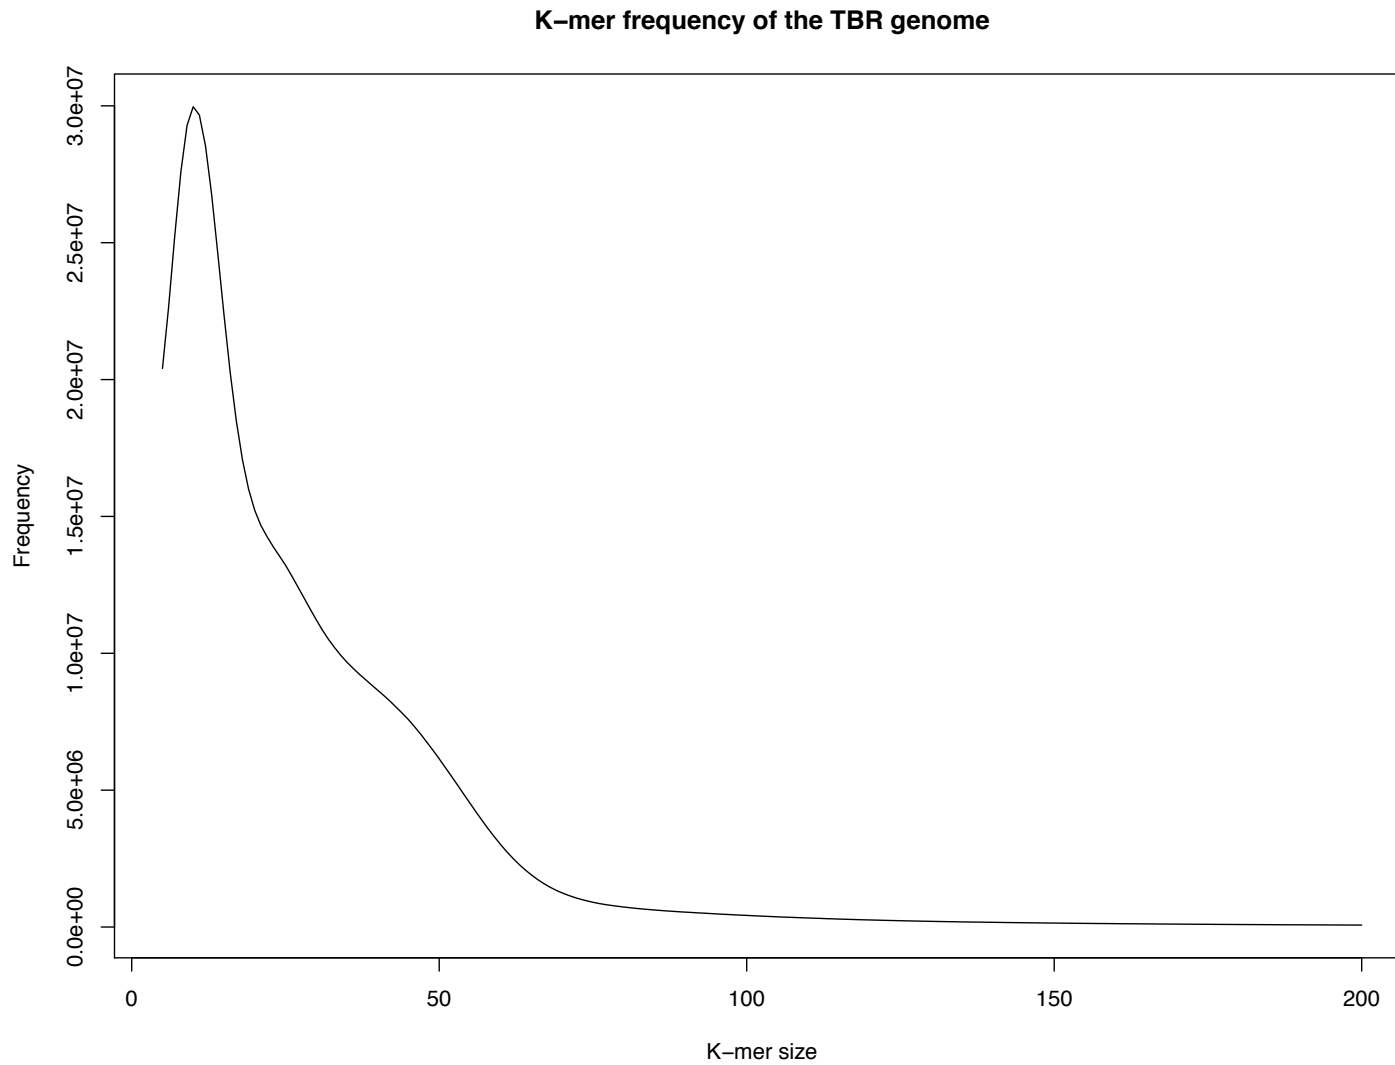

Supplementary Figure 5: The k-mer frequency of the TBR genome. The increased heterozygosity of the genome is validated by the tendency towards bimodal distribution of the k-mer frequency.

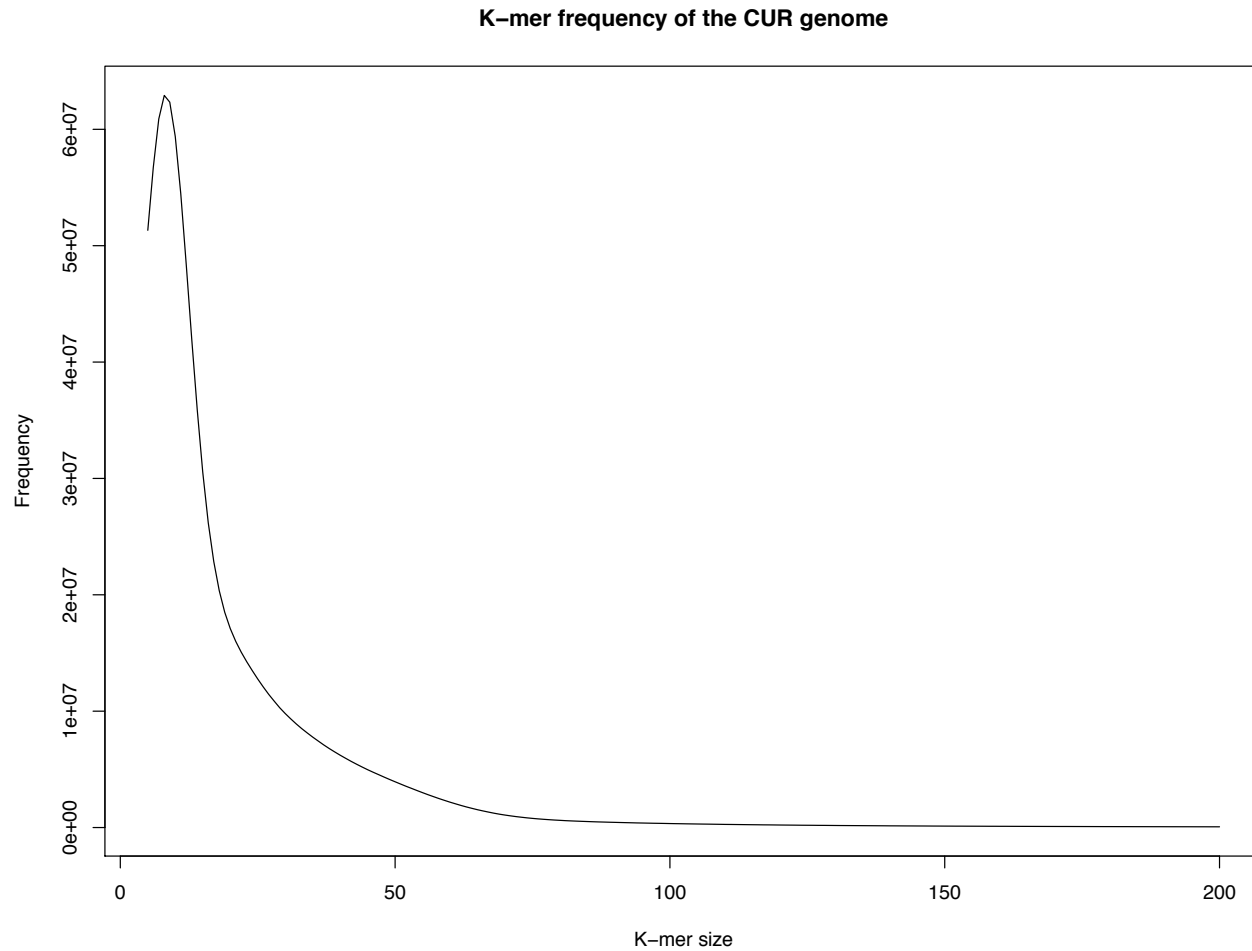

Supplementary Figure 6: The k-mer frequency of the CUR genome. The increased heterozygosity of the genome is validated by the tendency towards bimodal distribution of the k-mer frequency.
